# Supplementary material
Source: PubMed Central journal article supplement (PMC3725614)

**Supplementary Figure 2.** Silver staining of SDS-PAGE containing lysate and elution fractions before (Lysate) and after (IP Elute) affinity purification using anti-FLAG resin. 20ug of total cell lysate and 2ug of total elute (1/20 of elution fraction) were loaded on the gel for this analysis. M stands for protein standard marker.

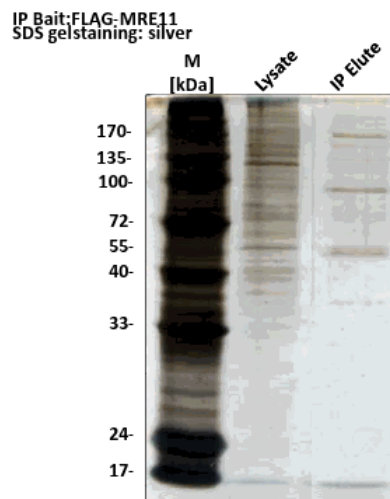

Supplement: NIHMS488812-supplement-Fig_S2.pdf [file NIHMS488812-supplement-Fig_S2.pdf]
