# Supplementary material
Source: PubMed Central journal article supplement (PMC3725614)
Supplement: NIHMS488812-supplement-Fig_S3.pdf [file NIHMS488812-supplement-Fig_S3.pdf]

A.

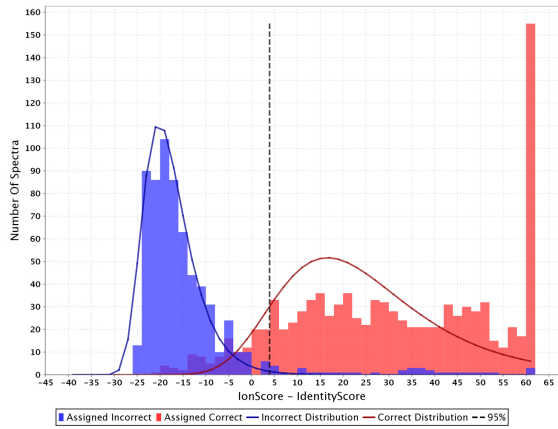

B.

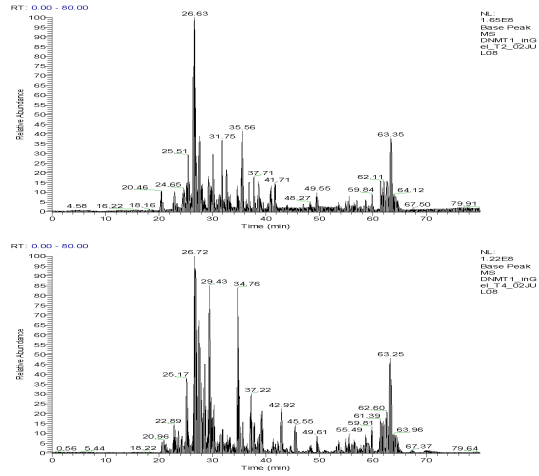

C.

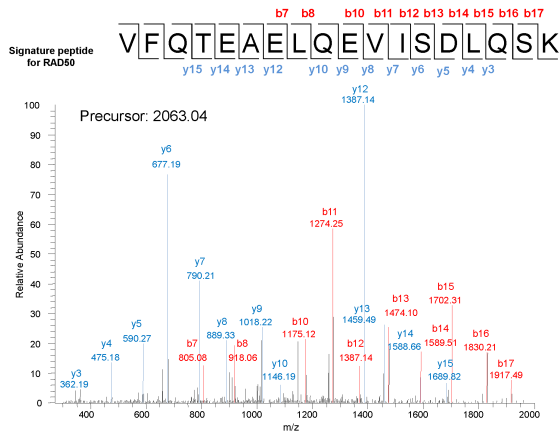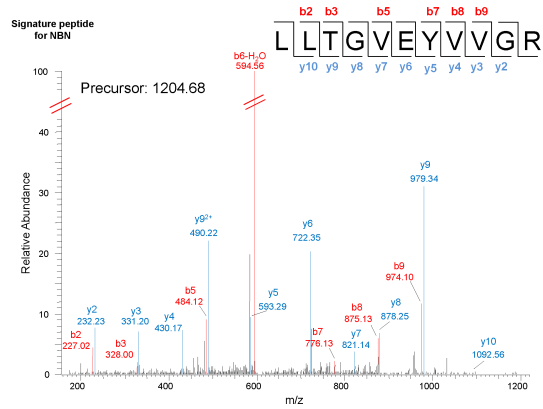

**Supplementary Figure 3** Mass spectrometry analysis of protein complexes obtained from affinity purification. (A) Scoring distribution plot for filtering of peptide scores/filtering MS data in mascot by scaffold statistical analysis (B) Base peak chromatograms representing the sample replicates (C) Annotated mass spectra of signature peptides which belong to MRE11 interactors RAD50 and NBN.
