# Supplementary material
Source: PubMed Central journal article supplement (PMC3725614)
Supplement: NIHMS488812-supplement-Fig_S4.pdf [file NIHMS488812-supplement-Fig_S4.pdf]

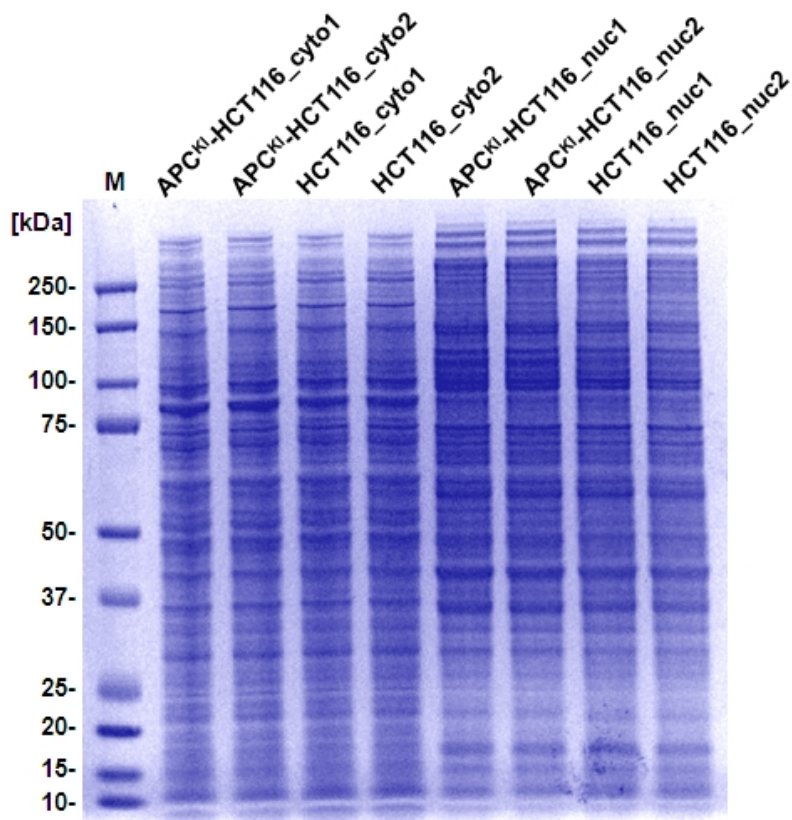

**Supplementary Figure 4** Protein 1D SDS-PAGE analyses of cellular fractions from APC<sup>K1</sup>-HCT116 and HCT116 cells. Total amount of 20 µg proteins from each fraction and standard protein marker (M) were loaded on a 4-12% gradient Bis-Tris gel followed by electrophoresis and Coomassie blue staining. The number at the end of each sample indicates the replicates.
