# Supplementary material
Source: PubMed Central journal article supplement (PMC3725614)
Supplement: NIHMS488812-supplement-Fig_S5.pdf [file NIHMS488812-supplement-Fig_S5.pdf]

A.

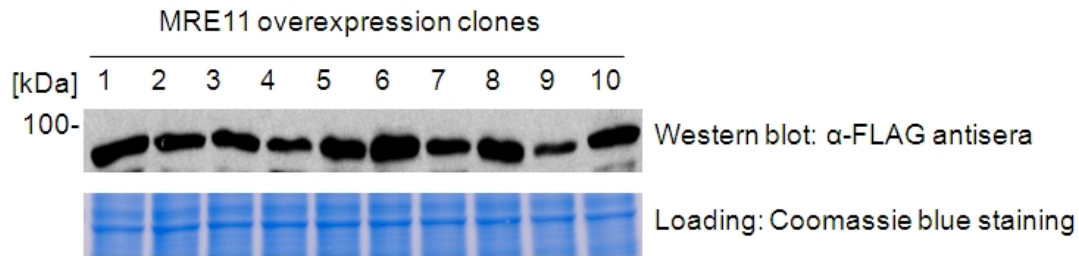

B.

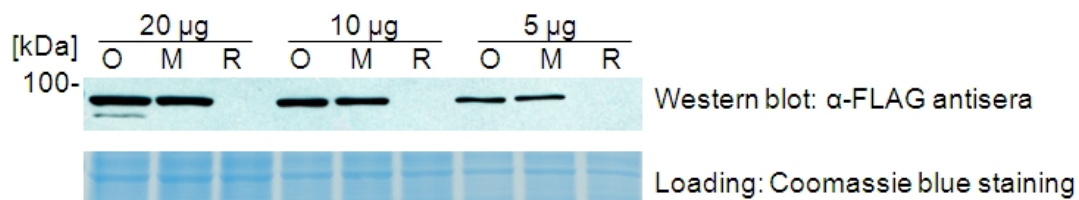

**Supplementary Figure 5 Protein analyses of FLAG-MRE11 in RKO cells.** (A) FLAG-MRE11 protein expression in individual FLAG-MRE11 overexpression clones. The number at the end of each sample indicates the individual overexpression clones of FLAG-MRE11. Total amount of 20  $\mu$ g proteins from each fraction were loaded on a 4-12% gradient Bis-Tris gel for electrophoresis followed by western blot with indicated antisera or Coomassie blue staining. (B) FLAG-MRE11 protein expression level in FLAG-MRE11 overexpression pool (O) compared to FLAG-MRE11 knock-in RKO cells (M) and parental RKO cells (R). Three loadings (20  $\mu$ g, 10  $\mu$ g and 5  $\mu$ g) were applied for each group of cells.
