# Supplementary material
Source: PubMed Central journal article supplement (PMC3725614)

**Supplementary Figure 6. Western blotting of DNMT1 knock-in cell lines**

Enlarged/Annotated Figure 2 for FLAG-DNMT1 and DNMT1 protein expression in (A) DNMT1<sup>Ki</sup>-RKO cells and (B) DNMT1<sup>Ki</sup>-HCT116 cells. FLAG-tagged DNMT1 and endogenous DNMT1 were labeled. In DNMT1<sup>Ki</sup>-RKO cells, the top band refers to DNMT1 alternative splicing variant DNMT1b.

(A)

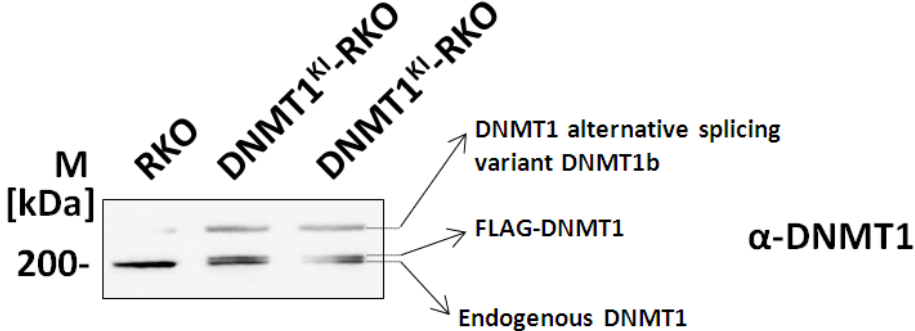

(B)

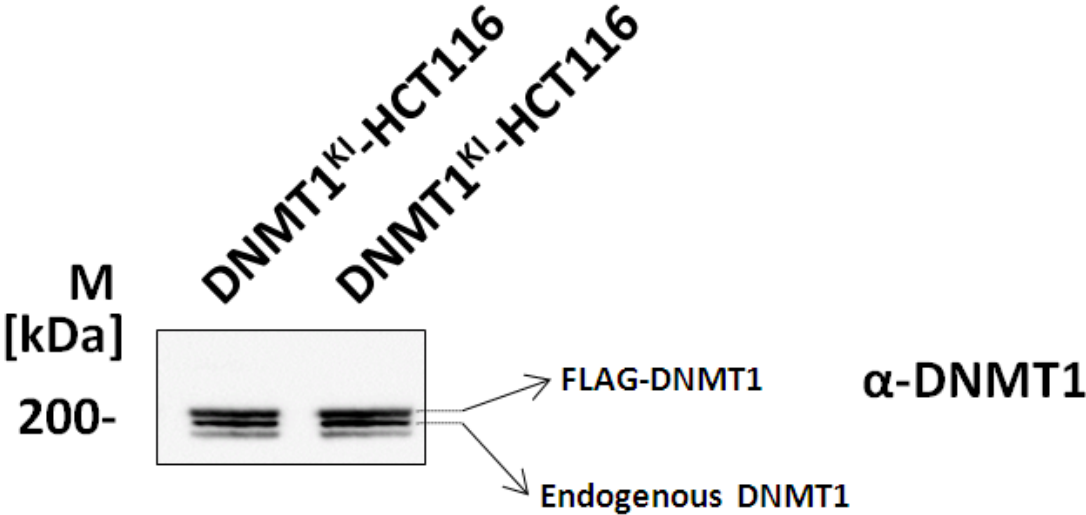

Supplement: NIHMS488812-supplement-Fig_S6.pdf [file NIHMS488812-supplement-Fig_S6.pdf]
