# Supplementary material
Source: PubMed Central journal article supplement (PMC3725614)

**Supplementary Figure 7. Benchmarking knock-in AP-MS against known interactions (A)**

Fraction of APC interactions identified that are known (BioGRID) vs the bait:control ratio threshold. (B) Different bait:control ratio distributions for BioGRID known and unknown APC interactions. Known interactions ( $p < 0.05$ ; Wilcoxon Rank Sum Test) have a significantly greater bait:control ratio than unknown interactions.

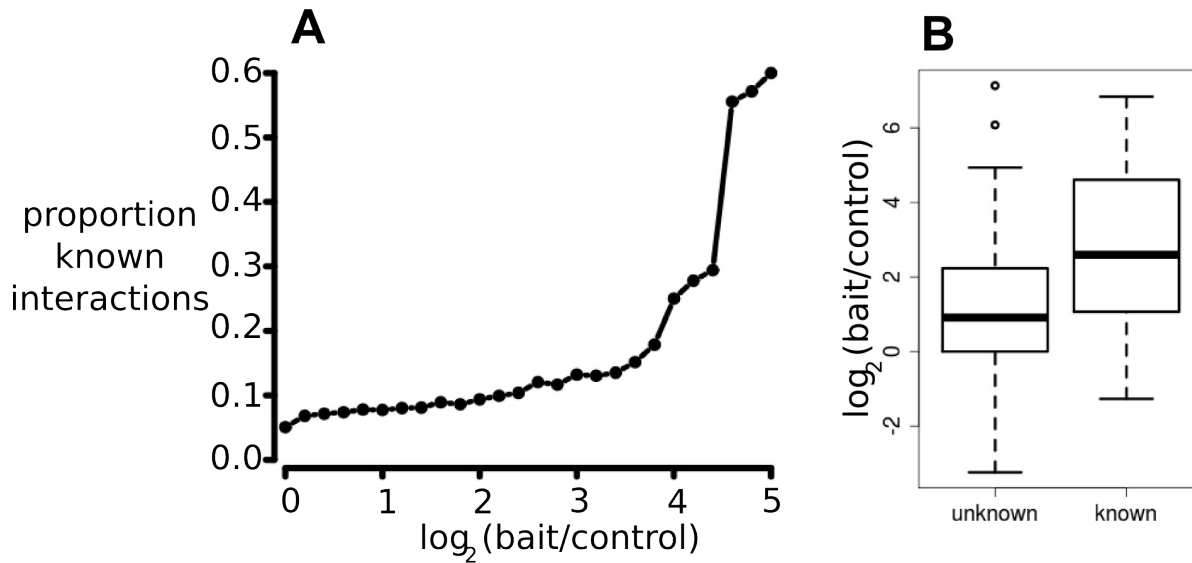

Supplement: NIHMS488812-supplement-Fig_S7.pdf [file NIHMS488812-supplement-Fig_S7.pdf]
