# Supplementary material
Source: PubMed Central journal article supplement (PMC3725614)
Supplement: NIHMS488812-supplement-Fig_S8.pdf [file NIHMS488812-supplement-Fig_S8.pdf]

## Supplementary Table Legends

**Supplementary Tables 1A-1D.** Protein identification details for AP-MS experiments (number of peptides, scores, sequence coverage). APC experiment 1 (1A), APC experiment 2 (1B), MRE11A (1C) and DNMT1 (1D)

**Supplementary Tables 2A-2D.** Spectral count analysis for proteins identified in AP-MS experiments (spectral counts, statistical analysis and significance). APC experiment 1 (2A), APC experiment 2 (2B), MRE11A (2C) and DNMT1 (2D)

**Supplementary Tables 3A and 3B.** Protein identifications and spectral counts for AP-MS APC sub-cellular fractionation experiments.

**Supplementary Table 4.** Spectral counts for knock-in and over-expression AP-MS experiments.
